# Supplementary material for: “We’re gonna die!” Do Brazilian conservation units provide protection to the Amazonian chelonians?
Source: Research Square preprint supplement (doi:10.21203/rs.3.rs-3730610/v1), 2023-12-13
Supplement: Supplementary file 1 [file 53c1700abea5719ea1347e4a.docx]

**Table 01:** Analysis of Variance (ANOVA) between Percentage (Perc) and Cumulative Percentage (Perc Acc) of the distribution area of chelonian species with occurrences in the Brazilian Amazon basin concerning the type of conservation unit. The analyses were performed for the total distribution area. by habitat. environment. and conservation status according to IUCN and ICMBio. and their occurrences in UCs. TIs. and outside these units. Outside – Outside of UCs or TI; TI – Indigenous Land; UPI – Full Protection Unit; UUS - Sustainable Use Unit; F – Fisher's F; df – Degrees of Freedom; p – Probability of Type I Error; LC – Least Concern; VU – Vulnerable; NT – Near Threatened; IUCN - International Union for Conservation of Nature; ICMBio – Chico Mendes Institute for Biodiversity Conservation.

|  |  |  | **Type** | **N** | **Mean** | **SD** | **F**(df,df) | **p** |
| --- | --- | --- | --- | --- | --- | --- | --- | --- |
| All Species | | Perc | Out | 17 | 0.200 | 0.013 | 598(3,32.9) | < .001 |
| TI | 0.536 | 0.036 |
| UPI | 0.093 | 0.023 |
| UUS | 0.172 | 0.034 |
| Perc Acc | Out | 17 | 0.200 | 0.013 | 8807(3,34.7) | < .001 |
| UPI | 0.088 | 0.014 |
| UPI + UUS | 0.265 | 0.037 |
| UPI + UUS + TI | 0.800 | 0.013 |
| Habitat | Aquatic | Perc | Out | 10 | 0.195 | 0.014 | 303(3,18.9) | < .001 |
| TI | 0.539 | 0.044 |
| UPI | 0.089 | 0.017 |
| UUS | 0.178 | 0.030 |
| Perc Acc | Out | 10 | 0.195 | 0.014 | 4404(3,19.4) | < .001 |
| UPI | 0.089 | 0.017 |
| UPI + UUS | 0.267 | 0.045 |
| UPI + UUS + TI | 0.805 | 0.014 |
| Semiaquatic | Perc | Out | 5 | 0.205 | 0.009 | 237(3,7.49) | < .001 |
| TI | 0.530 | 0.025 |
| UPI | 0.105 | 0.035 |
| UUS | 0.160 | 0.049 |
| Perc Acc | Out | 5 | 0.206 | 0.009 | 4588(3,8.62) | < .001 |
| UPI | 0.087 | 0.011 |
| UPI + UUS | 0.264 | 0.031 |
| UPI + UUS + TI | 0.795 | 0.009 |
| Ambient | Generalist | Perc | Out | 9 | 0.201 | 0.013 | 284(3,15.9) | < .001 |
| TI | 0.544 | 0.036 |
| UPI | 0.094 | 0.030 |
| UUS | 0.161 | 0.035 |
| Perc Acc | Out | 9 | 0.201 | 0.013 | 4937(3,17.4) | < .001 |
| UPI | 0.085 | 0.014 |
| UPI + UUS | 0.256 | 0.031 |
| UPI + UUS + TI | 0.799 | 0.013 |
| Lentic | Perc | Out | 4 | 0.203 | 0.009 | 271(3,6.22) | < .001 |
| TI | 0.534 | 0.027 |
| UPI | 0.086 | 0.011 |
| UUS | 0.178 | 0.024 |
| Perc Acc | Out | 4 | 0.203 | 0.009 | 3672(3,6.43) | < .001 |
| UPI | 0.086 | 0.011 |
| UPI + UUS | 0.263 | 0.036 |
| UPI + UUS + TI | 0.797 | 0.009 |
| IUCN | LC | Perc | Out | 9 | 0.200 | 0.014 | 337(3,16.3) | < .001 |
| TI | 0.534 | 0.031 |
| UPI | 0.099 | 0.028 |
| UUS | 0.168 | 0.042 |
| Perc Acc | Out | 9 | 0.200 | 0.014 | 4259(3,17.3) | < .001 |
| UPI | 0.089 | 0.013 |
| UPI + UUS | 0.266 | 0.038 |
| UPI + UUS + TI | 0.800 | 0.014 |
| VU | Perc | Out | 4 | 0.196 | 0.018 | 65.4(3,6.40) | < .001 |
| TI | 0.542 | 0.059 |
| UPI | 0.087 | 0.020 |
| UUS | 0.176 | 0.028 |
| Perc Acc | Out | 4 | 0.196 | 0.018 | 1007(3,6.49) | < .001 |
| UPI | 0.087 | 0.020 |
| UPI + UUS | 0.263 | 0.048 |
| UPI + UUS + TI | 0.804 | 0.018 |
| ICMBio | LC | Perc | Out | 12 | 0.200 | 0.015 | 364(3,22.7) | < .001 |
| TI | 0.541 | 0.038 |
| UPI | 0.093 | 0.027 |
| UUS | 0.166 | 0.037 |
| Perc Acc | Out | 12 | 0.200 | 0.015 | 5050(3,23.8) | < .001 |
| UPI | 0.086 | 0.014 |
| UPI + UUS | 0.259 | 0.038 |
| UPI + UUS + TI | 0.800 | 0.015 |
| NT | Perc | Out | 3 | 0.204 | 0.009 | 2022(3,4.40) | < .001 |
| TI | 0.542 | 0.006 |
| UPI | 0.084 | 0.007 |
| UUS | 0.171 | 0.009 |
| Perc Acc | Out | 3 | 0.204 | 0.009 | 2916(3,4.34) | < .001 |
| UPI | 0.084 | 0.007 |
| UPI + UUS | 0.254 | 0.016 |
| UPI + UUS + TI | 0.796 | 0.009 |

| CRYPTODIRA |  |  |  |  |  |  |  |
| --- | --- | --- | --- | --- | --- | --- | --- |
| Geoemydidae |  |  |  |  |  |  |  |
| *Rhinoclemmys punctularia* | Semiaquático | Generalista | LC | LC | Perema | 63 | (DAUDIN. 1801) |
| Kinosternidae |  |  |  |  |  |  |  |
| *Kinosternon scorpioides* | Semiaquático | Generalista | LC | LC | Peito-de-mola. muçuã | 179 | (LINNAEUS. 1766) |
| Testudinidae |  |  |  |  |  |  |  |
| *Chelonoidis carbonarius* | Terrícola | Terrícola | VU | LC | Jabuti-vermelho. jabuti-piranga | 305 | (SPIX. 1824) |
| *Chelonoidis denticulatus* | Terrícola | Terrícola | NT | LC | Jabuti-amarelo. jabuti-tinga | 384 | (LINNAEUS. 1766) |
| PLEURODIRA |  |  |  |  |  |  |  |
| Chelidae |  |  |  |  |  |  |  |
| Chelus fimbriata | Aquático | Lêntico | LC | LC | Mata-mata | 491 | (SCHNEIDER. 1783) |
| *Mesoclemmys gibba* | Semiaquático | Lêntico | LC | LC | Cágado-de-poças-da-floresta | 190 | (SCHWEIGGER. 1812) |
| *Mesoclemmys nasuta* | Semiaquático | Lêntico | DD | DD | Cágado-da-cabeça-de-sapo-comum | 17 | (SCHWEIGGER. 1812) |
| *Mesoclemmys raniceps* | Aquático | Generalista | LC | LC | Cágado-de-Cabeça-de-Sapo / lalá | 111 | (GRAY. 1856) |
| *Phrynops geoffroanus* | Aquático | Generalista | LC | LC | Cangapara. cágado-de-barbicha | 312 | (SCHWEIGGER. 1812) |
| *Phrynops tuberosus* | Aquático | Lótico | LC | LC | Cágado-de-barbicha. cágado-rajado | 68 | (PETERS. 1870) |
| *Platemys platycephala* | Semiaquático | Lêntico | LC | LC | Jabuti-machado | 192 | (SCHNEIDER. 1792) |
| *Rhinemys rufipes* | Aquático | Lótico | LC | LC | Cágado-vermelho | 34 | (SPIX. 1824) |
| Podocnemididae |  |  |  |  |  |  |  |
| *Peltocephalus dumerilianus* | Aquático | Generalista | VU | LC | Cabeçudo | 29 | (SCHWEIGGER. 1812) |
| *Podocnemis erythrocephala* | Aquático | Generalista | VU | DD | Irapuca | 169 | (SPIX. 1824) |
| *Podocnemis expansa* | Aquático | Generalista | CR | NT | Tartaruga-da-Amazônia | 470 | (SCHWEIGGER. 1812) |
| *Podocnemis sextuberculata* | Aquático | Generalista | VU | NT | Iaçá / pitiú | 148 | CORNALIA. 1849 |
| *Podocnemis unifilis* | Aquático | Generalista | EM | NT | Tracajá / zé-prego | 373 | TROSCHEL. 1848 |
| Total | | | | | | 3.535 |  |

Table S01: Number of individuals and trophic guild according to digital data and articles with occurrence points of chelonian species in South and Central America between March and August 2022.

**Table S02:** Observed (Obs) and Randomized (Aleat) values of importance for the conservation of chelonian species with distribution in the Brazilian Amazon. The values were calculated for outside PAs and TI (Outside), considering all PAs and TI together (PAs + TI), and for each type of UC (UPI – Full Protection Unit; UUS - Sustainable Use Unit) and for Indigenous Land (TI). p – Probability of Type I Error according to the Monte Carlo randomization test; LC – Least Concern; VU – Vulnerable; NT – Near Threatened; IUCN - International Union for Conservation of Nature; ICMBio – Chico Mendes Institute for Biodiversity Conservation.

|  |  | Out | | | PAs + TI | | | UPI | | | UUS | | | TI | | |
| --- | --- | --- | --- | --- | --- | --- | --- | --- | --- | --- | --- | --- | --- | --- | --- | --- |
|  |  | Obs | Aleat | p | Obs | Aleat | P | Obs | Aleat | p | Obs | Aleat | p | Obs | Aleat | P |
| All Species | | 0.845 | 0.846 | 0.569 | 0.868 | 0.846 | **0.000** | 0.899 | 0.846 | **0.000** | 0.916 | 0.846 | **0.000** | 0.847 | 0.846 | 0.198 |
| Habitat | Aquatic | 0.828 | 0.846 | 1.000 | 0.855 | 0.846 | **0.000** | 0.882 | 0.846 | **0.000** | 0.887 | 0.846 | **0.000** | 0.839 | 0.846 | 1.000 |
| Semiaquatic | 0.846 | 0.846 | 0.506 | 0.847 | 0.846 | 0.190 | 0.875 | 0.846 | **0.000** | 0.909 | 0.846 | **0.000** | 0.824 | 0.846 | 1.000 |
| Terrestrial | 0.861 | 0.846 | **0.000** | 0.809 | 0.846 | 1.000 | 0.845 | 0.846 | 0.554 | 0.845 | 0.846 | 0.555 | 0.788 | 0.846 | 1.000 |
| Ambient | Generalist | 0.842 | 0.846 | 0.979 | 0.861 | 0.846 | **0.000** | 0.887 | 0.846 | **0.000** | 0.912 | 0.846 | **0.000** | 0.842 | 0.846 | 0.973 |
| Lentic | 0.829 | 0.846 | 1.000 | 0.854 | 0.846 | **0.000** | 0.882 | 0.846 | **0.000** | 0.898 | 0.846 | **0.000** | 0.835 | 0.846 | 1.000 |
| Lotic | 0.777 | 0.846 | 1.000 | 0.806 | 0.846 | 1.000 | 0.844 | 0.846 | 0.725 | 0.841 | 0.846 | 0.829 | 0.784 | 0.846 | 1.000 |
| Terrestrial | 0.861 | 0.846 | **0.000** | 0.809 | 0.846 | 1.000 | 0.845 | 0.846 | 0.552 | 0.845 | 0.846 | 0.557 | 0.788 | 0.846 | 1.000 |
| IUCN | LC | 0.846 | 0.846 | 0.397 | 0.863 | 0.846 | **0.000** | 0.888 | 0.846 | **0.000** | 0.909 | 0.846 | **0.000** | 0.844 | 0.846 | 0.782 |
| ICMBio | LC | 0.840 | 0.846 | 0.995 | 0.857 | 0.846 | **0.000** | 0.879 | 0.846 | **0.000** | 0.897 | 0.846 | **0.000** | 0.841 | 0.846 | 0.995 |
| NT | 0.834 | 0.846 | 1.000 | 0.859 | 0.846 | **0.000** | 0.888 | 0.846 | **0.000** | 0.900 | 0.846 | **0.000** | 0.840 | 0.846 | 1.000 |
| DD | 0.708 | 0.846 | 1.000 | 0.724 | 0.846 | 1.000 | 0.812 | 0.846 | 1.000 | 0.856 | 0.846 | **0.027** | 0.666 | 0.846 | 1.000 |
