# Supplementary material for: “We’re gonna die!” Do Brazilian conservation units provide protection to the Amazonian chelonians?
Source: Research Square preprint supplement (doi:10.21203/rs.3.rs-3730610/v1), 2023-12-13
Supplement: Supplementary file 2 [file ed656f537411b62873821727.docx]

**Species Used**

We found 8,989 points for the 17 turtle species included in the study (Table S01) and (Figure 02). After data cleaning and removal of points without reference and duplicate points, 3,535 points remained (Table S01, Figure 02). All models presented AUC and TSS values exceeding 0.9 (Table S02). Brazil is one of the richest countries in turtle species, with 36 species throughout the country. This quantity includes species considered aquatic, semi-aquatic, and terrestrial. For this research, we focused on the Amazon biome, which hosts 17 species—10 aquatic, 5 semi-aquatic, and two terrestrial1,2, these chelonians are classified into habits: aquatic, semiaquatic, and terrestrial, which are as follows: *Rhinoclemmys punctularia* (perema), *Kinosternon scorpioides* (muçuã), *Chelus fimbriata* (mata-mata), *Mesoclemmys gibba* (cágado de poças da floresta), *Mesoclemmys nasuta* (cágado de cabeça de sapo), *Mesoclemmys raniceps* (lalá), *Phrynops geoffroanus* (cágado de barbicha), *Phrynops tuberosus* (cágado rajado), *Platemys platycephala* (jabuti macho), *Rhinemys rufipes* (cágado vermelho), *Peltocephalus dumerilianus* (cabeçudo), *Podocnemis erythrocephala* (irapuca), *Podocnemis expansa* (tartaruga da amazônia), *Podocnemis sextuberculata* (pitiú), *Podocnemis unifilis* (tracajá) e as duas espécies terrícolas, *Chelonoidis carbonarius* (jabuti vermelho) e *Chelonoidis denticulatus* (jabuti amarelo). As for their habitat, they are classified as generalists, lentic, lotic, and terrestrial. All the procedures described were carried out for all species present and considering only endangered species (IUCN and ICMBio). They were divided by habitat (aquatic, semiaquatic, and terrestrial), environment (generalists, lentic, lotic, and terrestrial), and IUCN and ICMBio classification (Table S01).

**Occurrence Data and Species Modeling**

We utilized occurrence points for species found in the Brazilian Amazon basin. The search for occurrence points was conducted from 1900 to September 2022, including all occurrence points located within and outside Brazilian territory. We considered data published in both indexed and non-indexed articles, searched digital databases, and consulted museums and curators. Initially, we searched for occurrence points in digital collections such as SpeciesLink (<https://specieslink.net/>) and the Global Biodiversity Information Facility (GBIF; [www.gbif.org](http://www.gbif.org/)), using species as keywords. For indexed literature, we used the ISI Web of Knowledge and Google Scholar databases with keywords such as "Podocnemididae," "Turtles," and "Testudine." Data with (1) occurrence records lacking dates and (2) records without coordinates were excluded.

**Environmental Variables**

In this study, we used hydrological variables, which were combined with climatic, physiographic, soil, and geological variables for modeling aquatic species 3,4. For freshwater species, we used the Hydroatlas 4 database containing 31 bioclimatic variables related to hydrology, hydrography, climate, soil types, and geology, with high spatial resolution of 1 km 4. For terrestrial species, we used the 19 bioclimatic variables available on WorldClim ([http://www.worldclim.org](http://www.worldclim.org/)) 4. These variables belong to a group of climatic variables derived from monthly temperature and precipitation values sampled throughout 1960-1990. To reduce multicollinearity in our dataset, a Principal Component Analysis (PCA) was performed 5 and used the eigenvalues as environmental variables. Next, we selected only the axes that represent an explanation equal to or greater than 95% 6, using these axes as model variables.

**Algorithms**

Models were created using four algorithms: Maximum Entropy (MXD) 7,8, Random Forest (RDF)9, Support Vector Machine (SVM)10 e Gausian-Bayesian (GAU) 11. To reduce uncertainty caused by different algorithms, an ensemble combining the final suitability maps generated by the algorithms was created 12–14. The RDF and SVM algorithms require species absence data. Therefore, we will create 50 pseudo-absences based on an environmental envelope to allocate pseudo-absences only in locations considered unsuitable for the occurrence of species 15. In the case of MXT, the models will be adjusted by the differentiation between occurrence records and 10,000 background points randomly sampled throughout the study area, while GAU is for the analysis of static observational time series data, static interventional data, and dynamic data.

To minimize model uncertainties, we considered an ensemble model as the final model 16,17. This ensemble model involves averaging the suitability values from models where the Jaccard threshold values 16 were greater than the average thresholds for each species 17. The Jaccard threshold was selected to minimize omission and commission errors in the models 16.

Additionally, we imposed spatial constraints on the models to minimize overprediction in distribution models 16,18. To achieve this, we created a binary occurrence map, where suitability values greater than the Jaccard threshold indicated species presence. We then divided this map into patches (basins) with and without species occurrence. Subsequently, we retained only the basins where the species was predicted and had occurrence records, or basins where the species was predicted and connected to basins with predictions and occurrence points, in the potential distribution map for the species 16. For partitioning the binary map, we considered two methods: 1) Species with more than 30 occurrence points – map partition using the chessboard method 19; 2) Species with fewer than 30 points – Random selection of a percentage of points for modeling and another for evaluation, with 70% of points selected for the model and 30% for evaluation 16. All procedures were carried out using the ENMTML function implemented in the ENMTL package ENMTL 19 in R environment 20.

**Model Evaluation**

The evaluation was performed using Receiver Operating Characteristic (ROC) curves, and the efficiency of each model was assessed through the True Skill Statistic (TSS) analysis, widely advocated as an appropriate discrimination metric that is independent of prevalence21,22. TSS is an intuitive method for measuring SDM performance, calculating sensitivity (true positive rate (TPR)) and specificity (true negative rate (TNR)) values, where predictions are expressed as presence-absence maps. This test slightly narrows down the occurrence area, leading to a less inclusive map, considering errors of omission in species distribution (false negative) and commission (false positive), with variation between -1 and +1 (Sensitivity + Specificity) to indicate the predictive ability of the models. Models with TSS values close to +1 reflect good predictive capacity, models with TSS between 0.2 and 0.6 are considered fair and/or moderate, and models with TSS close to 0 and negative values indicate low capacity.

However, TSS values can be misleading when the number of true negatives assigns higher values to species with lower prevalence 23. To avoid these deficiencies, we propose to focus the evaluation metrics on three components of the confusion matrix: true positives, false positives, and false negatives, neglecting true negatives that could inflate the data. In other words, we seek to maximize true positives and minimize false positives and false negatives in relation to true positives 24.

**References**

1. Vogt R. C. *Tartarugas da Amazônia*. (2008).

2. van Dijk, P. P., Iverson, J., Rhodin, A., Shaffer, B. & Bour, R. Turtles of the World, 7th Edition: Annotated Checklist of Taxonomy, Synonymy, Distribution with Maps, and Conservation Status. (2014) doi:10.3854/crm.5.000.checklist.v7.2014.

3. Frederico, R. G., De Marco, P. & Zuanon, J. Evaluating the use of macroscale variables as proxies for local aquatic variables and to model stream fish distributions. *Freshw. Biol.* **59**, 2303–2314 (2014).

4. McGarvey, D. J. *et al.* On the use of climate covariates in aquatic species distribution models: are we at risk of throwing out the baby with the bath water? *Ecography (Cop.).* **41**, 695–712 (2018).

5. Legendre, P. & Legendre, L. *Numerical ecology. In Developments in Environmental Modelling series*. *Elsevier* vol. 3 (2012).

6. De Marco, P. & Nóbrega, C. C. Evaluating collinearity effects on species distribution models: An approach based on virtual species simulation. *PLoS One* **13**, (2018).

7. Phillips, S. J., Dudík, M. & Schapire, R. E. A maximum entropy approach to species distribution modeling. *Proceedings, Twenty-First Int. Conf. Mach. Learn. ICML 2004* 655–662 (2004) doi:10.1145/1015330.1015412.

8. Phillips, S. J., Anderson, R. P., Dudík, M., Schapire, R. E. & Blair, M. E. Opening the black box: an open-source release of Maxent. *Ecography (Cop.).* **40**, 887–893 (2017).

9. Prasad, A. M., Iverson, L. R. & Liaw, A. Newer classification and regression tree techniques: Bagging and random forests for ecological prediction. *Ecosystems* **9**, 181–199 (2006).

10. Guo, Q., Kelly, M. & Graham, C. H. Support vector machines for predicting distribution of Sudden Oak Death in California. *Ecol. Modell.* **182**, 75–90 (2005).

11. Heckerman, D. & Geiger, D. Learning Bayesian Networks: A Unification for Discrete and Gaussian Domains. (2013).

12. Araújo, M. B. & New, M. Ensemble forecasting of species distributions. *Trends Ecol. Evol.* **22**, 42–47 (2007).

13. Diniz-Filho, J. A. F. *et al.* Partitioning and mapping uncertainties in ensembles of forecasts of species turnover under climate change. *Ecography (Cop.).* **32**, 897–906 (2009).

14. Marmion, M., Parviainen, M., Luoto, M., Heikkinen, R. K. & Thuiller, W. Evaluation of consensus methods in predictive species distribution modelling. *Divers. Distrib.* **15**, 59–69 (2009).

15. Engler, R., Guisan, A. & Rechsteiner, L. An improved approach for predicting the distribution of rare and endangered species from occurrence and pseudo-absence data. *J. Appl. Ecol.* **41**, 263–274 (2004).

16. Pimenta, M. *et al.* One size does not fit all: Priority areas for real world problems. *Ecol. Modell.* **470**, (2022).

17. Velazco, S. J. E., Villalobos, F., Galvão, F. & De Marco Júnior, P. A dark scenario for Cerrado plant species: Effects of future climate, land use and protected areas ineffectiveness. *Divers. Distrib.* **25**, 660–673 (2019).

18. Mendes, P., Velazco, S. J. E., de Andrade, A. F. A. & De Marco, P. Dealing with overprediction in species distribution models: How adding distance constraints can improve model accuracy. *Ecol. Modell.* **431**, 109180 (2020).

19. Andrade, A. F. A. de, Velazco, S. J. E. & De Marco Júnior, P. ENMTML: An R package for a straightforward construction of complex ecological niche models. *Environ. Model. Softw.* **125**, (2020).

20. R Core Team. R: A language and environment for statistical computing. *R Foundation for Statistical Computing, Vienna, Austria. URL http://www.R-project.org/.* at (2021).

21. Allouche, O., Tsoar, A. & Kadmon, R. Assessing the accuracy of species distribution models: Prevalence, kappa and the true skill statistic (TSS). *J. Appl. Ecol.* **43**, 1223–1232 (2006).

22. Shabani, F., Kumar, L. & Ahmadi, M. Assessing accuracy methods of species distribution models: AUC, Specificity, Sensitivity and the True Skill Statistic. *Glob. J. Hum. Soc. Sci.* **18**, 6–18 (2018).

23. Lawson, C. R., Hodgson, J. A., Wilson, R. J. & Richards, S. A. Prevalence, thresholds and the performance of presence-absence models. *Methods Ecol. Evol.* **5**, 54–64 (2014).

24. Leroy, B. *et al.* Title: Without quality presence-absence data, discrimination metrics such as TSS can be misleading measures of model performance 4 5 Word count: 3719 (without references) ; 5123 (with references). (2018).
